# Supplementary material for: Korea4K: whole genome sequences of 4,157 Koreans with 107 phenotypes derived from extensive health check-ups
Source: PubMed Central journal article supplement (PMC11020240; doi:10.1093/gigascience/giae014), 2024-04-16
Supplement: giae014_reviewer_1_report_revision_1.pdf [file giae014_reviewer_1_report_revision_1.pdf]

## Reviewer Report

**Title: Korea4K: whole genome sequences of 4,157 Koreans with 107 phenotypes derived from extensive health check-ups**

**Version: Revision 1**      **Date: 12/31/2023**

**Reviewer name: Pui-Yan Kwok**

### Reviewer Comments to Author:

The authors made attempts to address the issues raised previously but did not do so adequately.

1. Using the same GWAS cutoff of  $P < 5E-8$  and adding the FDR correction (Benjamini-Hochberg) does not solve the problem of multiple testing using whole genome sequencing data (where there are orders of magnitude more variants than those on typical SNP arrays) for the study. With clinical data available for only 2,262 samples, each phenotype under study will have a very small number of individuals, making the result of 2,314 variants from 30 clinical traits with significant association highly suspect. The authors should consult statisticians with experience using whole genome sequencing data for association studies to come up with a better statistical study design.

2. The authors acknowledge that using the newer reference will be a good approach but will not do so because the "T2T reference lacks enough annotation data" is not an adequate response. The point is to have the best variant calls for the Korea4K data, annotation is irrelevant until variants with significant association are identified. Claiming that they will do so in future versions of the project diminishes the significance of the current manuscript.

### Methods

Are the methods appropriate to the aims of the study, are they well described, and are necessary controls included? Choose an item.

### Conclusions

Are the conclusions adequately supported by the data shown? Choose an item.

### Reporting Standards

Does the manuscript adhere to the journal's guidelines on [minimum standards of reporting?](#) Choose an item.

Choose an item.

### Statistics

Are you able to assess all statistics in the manuscript, including the appropriateness of statistical tests used? Choose an item.

### **Quality of Written English**

Please indicate the quality of language in the manuscript: Choose an item.

### **Declaration of Competing Interests**

Please complete a declaration of competing interests, considering the following questions:

- Have you in the past five years received reimbursements, fees, funding, or salary from an organisation that may in any way gain or lose financially from the publication of this manuscript, either now or in the future?
- Do you hold any stocks or shares in an organisation that may in any way gain or lose financially from the publication of this manuscript, either now or in the future?
- Do you hold or are you currently applying for any patents relating to the content of the manuscript?
- Have you received reimbursements, fees, funding, or salary from an organization that holds or has applied for patents relating to the content of the manuscript?
- Do you have any other financial competing interests?
- Do you have any non-financial competing interests in relation to this paper?

If you can answer no to all of the above, write 'I declare that I have no competing interests' below. If your reply is yes to any, please give details below.

I declare that I have no competing interests.

I agree to the open peer review policy of the journal. I understand that my name will be included on my report to the authors and, if the manuscript is accepted for publication, my named report including any attachments I upload will be posted on the website along with the authors' responses. I agree for my report to be made available under an Open Access Creative Commons CC-BY license (<http://creativecommons.org/licenses/by/4.0/>). I understand that any comments which I do not wish to be included in my named report can be included as confidential comments to the editors, which will not be published.

Choose an item.

To further support our reviewers, we have joined with Publons, where you can gain additional credit to further highlight your hard work (see: <https://publons.com/journal/530/gigascience>). On publication of this paper, your review will be automatically added to Publons, you can then choose whether or not to claim your Publons credit. I understand this statement.

Yes Choose an item.
